# Supplementary material
Source: Research Square preprint supplement (doi:10.21203/rs.3.rs-9470877/v1)
Supplement: Supplementary file 1 [file 092fda5c869afd85c2261fb1.xlsx]

## Sheet: Table S1
Solovarov I.S., Belskikh A.V., Oyuntsetseg N, Liapunova N.A., Danchinova G.A., Khasnatinov M.A. Identification of phytochemicals from Terminalia chebula extract as potential antivirals against tick-borne encephalitis virus.
Supplemental Table S1
Binding site	Affinity (kcal/mol)	Estimated Ki	Ki units	Ligand efficiency	Exposed on virion surface
COR 2	-9.3	152.43	nM	-0.21	YES
COR 3	-9.2	180.45	nM	-0.2	YES
COR 5	-9.2	180.45	nM	-0.2	YES
COR 1	-9	252.91	nM	-0.2	YES
COR 6	-8.1	1.16	uM	-0.18	YES
COR 8	-7.9	1.62	uM	-0.18	No
COR 9	-7.8	1.92	uM	-0.17	No
COR 7	-7.6	2.69	uM	-0.17	No
COR 10	-7.4	3.77	uM	-0.16	No
COR 4	-7.3	4.46	uM	-0.16	YES
TGG 3	-9	252.91	nM	-0.2	YES
TGG 2	-8.9	299.41	nM	-0.2	YES
TGG 6	-8.9	299.41	nM	-0.2	YES
TGG 1	-8.8	354.46	nM	-0.2	YES
TGG 5	-8.8	354.46	nM	-0.2	YES
TGG 8	-8.8	354.46	nM	-0.2	No
TGG 9	-8.7	419.63	nM	-0.19	No
TGG 4	-8	1.37	uM	-0.18	YES
TGG 10	-7.8	1.92	uM	-0.17	No
TGG 7	-7.7	2.27	uM	-0.17	No
PUN 2	-10.4	23.81	nM	-0.13	No
PUN 4	-10.4	23.81	nM	-0.13	No
PUN 3	-10.3	28.19	nM	-0.13	No
PUN 8	-10.3	28.19	nM	-0.13	No
PUN 6	-9.8	65.55	nM	-0.13	No
PUN 10	-9.4	128.75	nM	-0.12	No
PUN 9	-9.1	213.63	nM	-0.12	No
PUN 1	-8.9	299.41	nM	-0.11	YES
PUN 5	-8.9	299.41	nM	-0.11	YES
PUN 7	-8.2	975.81	nM	-0.11	No

## Sheet: Table2
Solovarov I.S., Belskikh A.V., Oyuntsetseg N, Liapunova N.A., Danchinova G.A., Khasnatinov M.A. Identification of phytochemicals from Terminalia chebula extract as potential antivirals against tick-borne encephalitis virus.
Table 2
Binding site	Affinity, kKal/mol	Protein involved	Amino acid residues bound	Functional elements affected	Function distorted	Pattern
COR 1	-9	M	H17	Fusion loop; pH-sensing histidines;	pH-dependent conformation change; M-E heterodimer stabilisation; membrane fusion	"fl"
		E	E7; D98; P247
COR 2	-9.3	M	H17
		E	R2; H5; D98; G101; N102; K284
COR 3	-9.2	M	H17
		E	R2; H5; D98; G101; N102; P247; K284
COR 5	-9.2	M	H17
		E	R2; H5; D98; G101; N102
COR 4	-7.3	E	H62; A63; A123; E207; H208; N256	DI-DII hinge region; hydrophobic pocket; B-cells epitope; FNV-32 linear epitope	Conformational rearrangements of E-protein monomers	"hr"
COR 6	-8.1	E	T211; V254; K284
TGG 1	-8.8	E	H5; E7; D98; N103; N154; R160; P247	fusion loop; N154 glycosilation site; FNV-32 neutralising epitope	Binding to host cell surface; Stabilisation of E protein homodimer	"fl"
TGG 2	-8.9	E	H5; E7; N8; G28; N103; A153; N154; R160
TGG 3	-9	E	R2; H5; E7; D98; G102; N103; A153; E155; R160; H248; K284
TGG 5	-8.8	M	R103
		E	R2; E7; N8; G102; N103; A153; N154; R160
TGG 6	-8.9	E	R2; H5; D98; G102; N103; A153; R160; P247
TGG 4	-8	E	C121; K124; K126; H130; E201; K204; A232; R233; W235; Y281	DI-DII hinge region; hydrophobic pocket; linear neutralizing epitope for B-cells	Conformational rearrangements of E-protein monomers	"hr"
PUN 1	-8.9	E	R2; H5; G100; K142; K251	Fusion loop; hydrophobic pocket; FNV-32 neutralising epitope	pH-dependent conformation change; M-E heterodimer stabilisation; membrane fusion	"fl"
PUN 5	-8.9	E	K126; K204; R233	Hydrophobic pocket; B-cells epitope	Conformational rearrangements of E-protein monomers	"hr"
